# Supplementary material for: DAMA: a method for computing multiple alignments of protein structures using local structure descriptors
Source: Oxford University Press journal article supplement (doi:10.1093/bioinformatics/btab571), 2021-08-12
Supplement: btab571_supplementary_data.pdf [file btab571_supplementary_data.pdf]

Table S1: A subset of the protein kinase type superfamily used in the structural alignment validation study of DAMA.

| PDB id | Group | Name                  | Description                                                 |
|--------|-------|-----------------------|-------------------------------------------------------------|
| 1B01   | ATK   | PIP $\text{KII}\beta$ | Type II $\beta$ phosphatidylinositol phosphate kinase       |
| 1IA9   | ATK   | ChaK                  | Transient receptor potential channel kinase domain          |
| 1E8X   | ATK   | P13K                  | Phosphoinositide 3-kinase catalytic subunit                 |
| 1CJA   | ATK   | AFK                   | Actin-fragmin kinase                                        |
| 1NW1   | ATK   | CKA-2                 | Choline Kinase                                              |
| 1J7U   | ATK   | APH(3')-IIIa          | Aminoglycoside phosphotransferase                           |
| 1CDK   | AGC   | PKA                   | cAMP dependent protein kinase                               |
| 106L   | AGC   | PKB/Akt               | Protein kinase B                                            |
| 10MW   | AGC   | GRK2                  | G protein-coupled receptor kinase 2                         |
| 1H1W   | AGC   | PDK1                  | 3-phosphoinositide dependent protein kinase-1               |
| 1MU0   | Other | Aur2                  | Aurora-2 kinase                                             |
| 1TKI   | CAMK  | TK                    | Titin kinase                                                |
| 1JKL   | CAMK  | DAPK                  | Death-associated protein kinase                             |
| 1A06   | CAMK  | CaMK1                 | Calcium/calmodulin-dependent protein kinase 1               |
| 1PHK   | CAMK  | PhK                   | Phosphorylase kinase                                        |
| 1KWP   | CAMK  | MAPKAPK2              | Mitogen-activated protein kinase-activated protein kinase 2 |
| 11A8   | CAMK  | Chk1                  | Cell cycle checkpoint kinase                                |
| 1GNG   | CMGC  | GSK3                  | Glycogen synthase kinase 3                                  |
| 1HCK   | CMGC  | CDK2                  | Cyclin-dependent kinase 2                                   |
| 1JNK   | CMGC  | JNK3                  | c-Jun N-terminal kinase 3                                   |
| 1HOW   | CMGC  | Sky1p                 | -                                                           |
| 1LP4   | Other |                       | Protein kinase CK2                                          |
| 1F3M   | STE   | PAK1                  | p21-activated kinase 1                                      |
| 106Y   | Other | PknB                  | -                                                           |
| 1CSN   | CK1   | CK1                   | Casein kinase 1                                             |
| 1B6C   | TKL   | TGF $\beta$ R1        | Type 1 TG93 receptor                                        |
| 2SRC   | TK    | c-Src                 | -                                                           |
| 1LUF   | TK    | MuSK                  | Muscle-specific kinase                                      |
| 11R3   | TK    | IRK                   | Insulin receptor kinase                                     |
| 1M14   | TK    | EGFR                  | Epidermal growth factor receptor kinase domain              |
| 1GJO   | TK    | FGFR2                 | Fibroblast growth factor receptor 2 kinase domain           |

Table S2: Structural features used to analyze the structural alignments of the selected kinase-like proteins - compare to Scheeff and Bourne [2005].

| No. | Feature                                                                       |
|-----|-------------------------------------------------------------------------------|
| 1   | Ion pair analogous to K72-E91 in PKA.                                         |
| 2   | $\alpha$ -Helix B.                                                            |
| 3   | $\alpha$ -Helix C.                                                            |
| 4   | $\beta$ -strand 4.                                                            |
| 5   | Helical structure in the area of $\alpha$ -Helix D.                           |
| 6   | $\alpha$ -Helix E.                                                            |
| 7   | Key conserved histidine at H158.                                              |
| 8   | Large helical insertion between Helix E and Strand 6.                         |
| 9   | Structure underlying the catalytic region.                                    |
| 10  | Architecture of the catalytic region.                                         |
| 11  | Insertion in the catalytic region.                                            |
| 12  | Asp residue at 171, or apparent compensation for its absence.                 |
| 13  | Similar direct hydrophobic link between catalytic region and Helix E.         |
| 14  | Nature of structure linking Strand 9 and Helix F / analogous ion pair in PKA. |
| 15  | Helix F.                                                                      |
| 16  | Helices G, H and I.                                                           |
| 17  | Extensive helical insertions between Helix G and Helix H (AGCs only).         |
| 18  | Insertion between R280 and Helix I (CMGCs only).                              |
| 19  | Helix I structure (TPKs only).                                                |

Table S3: Area under the profile curves shown in Figures 4 and S1.

|           | Whole set |       | Safe subset |       |
|-----------|-----------|-------|-------------|-------|
|           | $Q_C$     | $Q_P$ | $Q_C$       | $Q_P$ |
| MASS      | 0.300     | 0.372 | 0.475       | 0.540 |
| Matt      | 0.584     | 0.660 | 0.845       | 0.899 |
| MultiProt | 0.526     | 0.573 | 0.647       | 0.677 |
| MUSTANG   | 0.517     | 0.620 | 0.798       | 0.899 |
| POSA      | 0.615     | 0.631 | 0.814       | 0.814 |
| 3DCOMB    | 0.680     | 0.866 | 0.842       | 0.938 |
| MISTRAL   | 0.478     | 0.607 | 0.675       | 0.736 |
| MMult     | 0.551     | 0.723 | 0.741       | 0.864 |
| MAPSCI    | 0.525     | 0.753 | 0.696       | 0.829 |
| DAMA      | 0.771     | 0.908 | 0.849       | 0.946 |

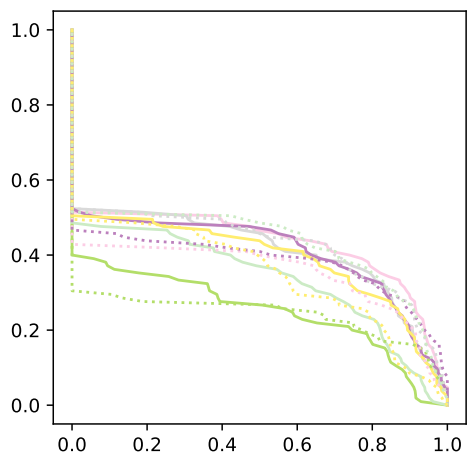

(a)

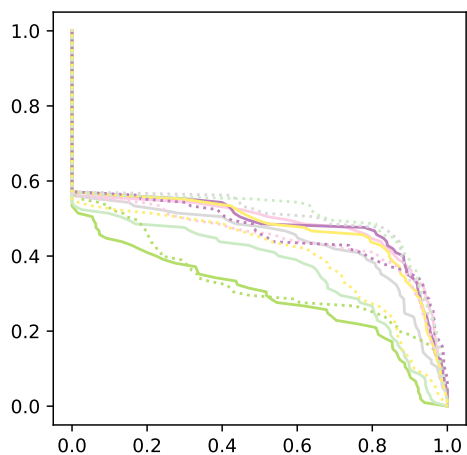

(b)

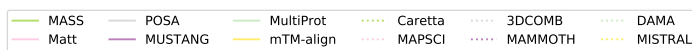

Figure S1: Performance profiles for the subset of 60 alignments selected from the SISY-multiple dataset, for which none of the methods failed, for the  $Q_C$  (a) and  $Q_P$  (b) measures.

Table S4: Agreement of the 3DCOMB alignment with the reference set concerning 19 traits enumerated in [Scheeff and Bourne, 2005]. Numbers denote classes of the trait alignments. Structures belonging to the same class are aligned with each other according to reference mentioned above. Note, that a method reproducing reference alignment would result in only one class for each trait. Blanks indicate lack of traits.

| Structure ID | Trait |    |   |   |   |   |   |   |   |    |    |    |    |    |    |    |    |    |    |
|--------------|-------|----|---|---|---|---|---|---|---|----|----|----|----|----|----|----|----|----|----|
|              | 1     | 2  | 3 | 4 | 5 | 6 | 7 | 8 | 9 | 10 | 11 | 12 | 13 | 14 | 15 | 16 | 17 | 18 | 19 |
| 1jkl A       | 1     | 10 | 1 | 1 | 1 | 1 | 1 | 1 | 1 | 1  | 1  | 1  | 1  | 2  | 1  | 1  | 1  | 1  | 1  |
| 1o6l A       | 1     | 3  | 1 | 1 | 1 | 1 | 1 | 1 | 1 | 1  | 1  | 1  | 1  | 17 | 1  | 1  | 5  | 1  | 1  |
| 1m14 A       | 1     | 2  | 1 | 1 | 1 | 1 | 1 | 1 | 1 | 1  | 1  | 1  | 1  | 15 | 1  | 1  | 1  | 6  | 6  |
| 1phk A       | 1     | 8  | 1 | 1 | 1 | 1 | 1 | 1 | 1 | 1  | 1  | 1  | 1  | 2  | 1  | 1  | 1  | 1  | 1  |
| 1tki A       | 1     | 1  | 1 | 1 | 1 | 1 | 1 | 1 | 1 | 1  | 1  | 1  | 1  | 3  | 1  | 1  | 1  | 1  | 1  |
| 1luf A       | 1     | 2  | 1 | 1 | 1 | 1 | 1 | 1 | 1 | 1  | 1  | 1  | 1  | 10 | 1  | 1  | 1  | 1  | 5  |
| 1jnk A       | 1     | 9  | 1 | 1 | 1 | 1 | 1 | 1 | 1 | 1  | 1  | 1  | 1  | 6  | 1  | 1  | 1  | 3  | 1  |
| 1ir3 A       | 1     | 2  | 3 | 1 | 1 | 1 | 1 | 1 | 1 | 1  | 1  | 1  | 1  | 5  | 1  | 1  | 1  | 4  | 4  |
| 1csn A       | 1     | 11 | 2 | 1 | 1 | 1 | 1 | 1 | 1 | 1  | 1  | 1  | 1  | 21 | 1  | 1  | 1  | 2  | 2  |
| 1hck A       | 3     | 4  | 4 | 1 | 1 | 1 | 1 | 1 | 1 | 1  | 1  | 1  | 1  | 19 | 1  | 1  | 5  | 1  | 1  |
| 2src A       | 1     | 1  | 1 | 1 | 1 | 1 | 1 | 1 | 1 | 1  | 1  | 1  | 1  | 16 | 1  | 1  | 1  | 2  | 2  |
| 1how A       | 1     | 1  | 1 | 1 | 1 | 1 | 1 | 1 | 1 | 1  | 1  | 1  | 1  | 4  | 1  | 1  | 1  | 1  | 1  |
| 1o6y A       | 1     | 6  | 1 | 1 | 1 | 1 | 1 | 1 | 1 | 1  | 1  | 1  | 1  | 3  | 1  | 1  | 1  | 2  | 2  |
| 1cdk A       | 1     | 3  | 1 | 1 | 1 | 1 | 1 | 1 | 1 | 1  | 1  | 1  | 1  | 18 | 1  | 1  | 2  | 1  | 1  |
| 1omw A       | 4     | 5  | 6 | 1 | 1 | 1 | 1 | 1 | 1 | 1  | 1  | 1  | 1  | 20 | 1  | 1  | 3  | 1  | 1  |
| 1a06 A       | 1     | 1  | 2 | 1 | 1 | 1 | 1 | 1 | 1 | 1  | 1  | 1  | 1  | 3  | 1  | 1  | 1  | 1  | 1  |
| 1kwp A       | 1     | 1  | 1 | 1 | 1 | 1 | 1 | 1 | 1 | 1  | 1  | 1  | 1  | 4  | 1  | 1  | 1  | 1  | 1  |
| 1muo A       | 1     | 5  | 1 | 1 | 1 | 1 | 1 | 1 | 1 | 1  | 1  | 1  | 1  | 1  | 1  | 1  | 1  | 1  | 1  |
| 1h1w A       | 1     | 3  | 1 | 1 | 1 | 1 | 1 | 1 | 1 | 1  | 1  | 1  | 1  | 1  | 1  | 1  | 4  | 1  | 1  |
| 1lp4 A       | 1     | 1  | 1 | 1 | 1 | 1 | 1 | 1 | 1 | 1  | 1  | 1  | 1  | 2  | 1  | 1  | 1  | 1  | 1  |
| 1ia8 A       | 1     | 4  | 1 | 1 | 1 | 1 | 1 | 1 | 1 | 1  | 1  | 1  | 1  | 7  | 1  | 1  | 1  | 3  | 3  |
| 1b6c B       | 1     | 1  | 1 | 1 | 1 | 1 | 1 | 1 | 1 | 1  | 1  | 1  | 1  | 13 | 1  | 1  | 1  | 1  | 1  |
| 1f3m C       | 1     | 3  | 1 | 1 | 1 | 1 | 1 | 1 | 1 | 1  | 1  | 1  | 1  | 12 | 1  | 1  | 1  | 2  | 2  |
| 1gng A       | 1     | 1  | 1 | 1 | 1 | 1 | 1 | 1 | 1 | 1  | 1  | 1  | 1  | 9  | 1  | 1  | 1  | 1  | 1  |
| 1gjo A       | 1     | 2  | 1 | 1 | 1 | 1 | 1 | 1 | 1 | 1  | 1  | 1  | 1  | 8  | 1  | 1  | 2  | 1  | 1  |
| 1bo1 A       | 1     | 1  | 1 | 1 | 1 | 1 | 1 | 2 | 2 | 2  | 2  | 2  | 2  | 14 | 3  | 1  | 1  | 1  | 1  |
| 1ia9 A       | 1     | 7  | 1 | 1 | 1 | 1 | 1 | 1 | 1 | 2  | 1  | 1  | 1  | 11 | 2  | 1  | 1  | 1  | 1  |
| 1e8x A       | 2     | 2  | 2 | 2 | 1 | 3 | 1 | 4 | 1 | 1  | 1  | 1  | 1  | 1  | 5  | 1  | 1  | 1  | 1  |
| 1cja A       | 1     | 1  | 1 | 2 | 2 | 2 | 1 | 3 | 1 | 1  | 1  | 1  | 1  | 1  | 4  | 1  | 1  | 1  | 1  |
| 1nw1 A       | 1     | 1  | 1 | 3 | 3 | 2 | 1 | 1 | 1 | 1  | 1  | 1  | 1  | 1  | 2  | 1  | 1  | 1  | 1  |
| 1j7u A       | 1     | 1  | 5 | 1 | 1 | 2 | 1 | 2 | 1 | 1  | 1  | 1  | 1  | 1  | 2  | 1  | 1  | 1  | 2  |

Table S5: Agreement of the DAMA alignment with the reference set concerning 19 traits enumerated in [Scheff and Bourne, 2005]. Numbers denote classes of the trait alignments. Structures belonging to the same class are aligned with each other according to reference mentioned above. Note, that a method reproducing reference alignment would result in only one class for each trait. Blanks indicate lack of traits.

| Structure ID | Trait |   |   |   |   |   |   |   |   |    |    |    |    |    |    |    |    |    |    |
|--------------|-------|---|---|---|---|---|---|---|---|----|----|----|----|----|----|----|----|----|----|
|              | 1     | 2 | 3 | 4 | 5 | 6 | 7 | 8 | 9 | 10 | 11 | 12 | 13 | 14 | 15 | 16 | 17 | 18 | 19 |
| 1jkl A       | 1     | 1 | 1 | 1 | 1 | 1 | 1 | 1 | 1 | 1  | 1  | 1  | 1  | 1  | 1  | 1  | 1  | 1  | 1  |
| 1o6l A       | 1     | 1 | 1 | 1 | 1 | 1 | 1 | 2 | 1 | 1  | 1  | 1  | 1  | 2  | 2  | 2  | 2  | 2  | 2  |
| 1m14 A       | 1     | 1 | 1 | 1 | 1 | 1 | 1 | 1 | 1 | 1  | 1  | 1  | 1  | 1  | 1  | 1  | 1  | 1  | 1  |
| 1phk A       | 1     | 1 | 1 | 1 | 1 | 1 | 1 | 1 | 1 | 1  | 1  | 1  | 1  | 1  | 1  | 1  | 1  | 1  | 1  |
| 1tki A       | 1     | 1 | 1 | 1 | 1 | 1 | 1 | 1 | 1 | 1  | 1  | 1  | 1  | 1  | 1  | 1  | 1  | 1  | 1  |
| 1luf A       | 1     | 1 | 1 | 1 | 1 | 1 | 1 | 1 | 1 | 1  | 1  | 1  | 1  | 1  | 1  | 1  | 1  | 1  | 1  |
| 1jnk A       | 1     | 1 | 1 | 1 | 1 | 1 | 1 | 1 | 1 | 1  | 1  | 1  | 1  | 1  | 1  | 1  | 1  | 1  | 1  |
| 1ir3 A       | 1     | 1 | 1 | 1 | 1 | 1 | 1 | 3 | 1 | 1  | 1  | 1  | 1  | 3  | 3  | 3  | 3  | 3  | 3  |
| 1csn A       | 1     | 1 | 1 | 1 | 1 | 1 | 1 | 1 | 1 | 1  | 1  | 1  | 1  | 1  | 1  | 1  | 1  | 1  | 1  |
| 1hck A       | 1     | 1 | 1 | 1 | 1 | 1 | 1 | 1 | 1 | 1  | 1  | 1  | 1  | 1  | 1  | 1  | 1  | 1  | 1  |
| 2src A       | 1     | 1 | 1 | 1 | 1 | 1 | 1 | 1 | 1 | 1  | 1  | 1  | 1  | 1  | 1  | 1  | 1  | 1  | 1  |
| 1how A       | 1     | 1 | 1 | 1 | 1 | 1 | 1 | 1 | 1 | 1  | 1  | 1  | 1  | 1  | 1  | 1  | 1  | 1  | 1  |
| 1o6y A       | 1     | 1 | 1 | 1 | 1 | 1 | 1 | 1 | 1 | 1  | 1  | 1  | 1  | 1  | 1  | 1  | 1  | 1  | 1  |
| 1cdk A       | 1     | 1 | 1 | 1 | 1 | 1 | 1 | 1 | 1 | 1  | 1  | 1  | 1  | 1  | 1  | 1  | 1  | 1  | 1  |
| 1omw A       | 1     | 1 | 1 | 1 | 1 | 1 | 1 | 1 | 1 | 1  | 1  | 1  | 1  | 1  | 1  | 1  | 1  | 1  | 1  |
| 1a06 A       | 1     | 1 | 1 | 1 | 1 | 1 | 1 | 1 | 1 | 1  | 1  | 1  | 1  | 1  | 1  | 1  | 1  | 1  | 1  |
| 1kwp A       | 1     | 1 | 1 | 1 | 1 | 1 | 1 | 1 | 1 | 1  | 1  | 1  | 1  | 1  | 1  | 1  | 1  | 1  | 1  |
| 1muo A       | 1     | 1 | 1 | 1 | 1 | 1 | 1 | 1 | 1 | 1  | 1  | 1  | 1  | 1  | 1  | 1  | 1  | 1  | 1  |
| 1h1w A       | 1     | 1 | 1 | 1 | 1 | 1 | 1 | 2 | 1 | 1  | 1  | 1  | 1  | 2  | 2  | 2  | 2  | 3  | 2  |
| 1lp4 A       | 1     | 1 | 1 | 1 | 1 | 1 | 1 | 1 | 1 | 1  | 1  | 1  | 1  | 1  | 1  | 1  | 1  | 1  | 1  |
| 1ia8 A       | 1     | 1 | 1 | 1 | 1 | 1 | 1 | 1 | 1 | 1  | 1  | 1  | 1  | 1  | 1  | 1  | 1  | 1  | 1  |
| 1b6c B       | 1     | 1 | 1 | 1 | 1 | 1 | 1 | 1 | 1 | 1  | 1  | 1  | 1  | 1  | 1  | 1  | 1  | 1  | 1  |
| 1f3m C       | 1     | 1 | 1 | 1 | 1 | 1 | 1 | 1 | 1 | 1  | 1  | 1  | 1  | 1  | 1  | 1  | 1  | 1  | 1  |
| 1gng A       | 1     | 1 | 1 | 1 | 1 | 1 | 1 | 2 | 1 | 1  | 1  | 1  | 1  | 2  | 2  | 2  | 2  | 2  | 2  |
| 1gjo A       | 1     | 1 | 1 | 1 | 1 | 1 | 1 | 1 | 1 | 1  | 1  | 1  | 1  | 1  | 1  | 1  | 1  | 1  | 1  |
| 1bo1 A       | 1     | 1 | 1 | 1 | 1 | 1 | 1 | 1 | 1 | 1  | 1  | 1  | 1  | 1  | 1  | 1  | 1  | 1  | 1  |
| 1ia9 A       | 1     | 1 | 1 | 1 | 1 | 1 | 1 | 1 | 1 | 1  | 1  | 1  | 1  | 1  | 1  | 1  | 1  | 1  | 1  |
| 1e8x A       | 1     | 1 | 1 | 1 | 1 | 1 | 1 | 1 | 1 | 1  | 1  | 1  | 1  | 1  | 1  | 1  | 1  | 1  | 1  |
| 1cja A       | 1     | 1 | 1 | 1 | 1 | 1 | 1 | 1 | 1 | 1  | 1  | 1  | 1  | 2  | 1  | 1  | 1  | 1  | 1  |
| 1nw1 A       | 1     | 1 | 1 | 1 | 1 | 1 | 1 | 1 | 1 | 1  | 1  | 1  | 1  | 1  | 1  | 1  | 1  | 2  | 1  |
| 1j7u A       | 1     | 1 | 1 | 1 | 1 | 1 | 1 | 1 | 1 | 1  | 1  | 1  | 1  | 1  | 1  | 1  | 2  | 1  | 1  |

|       | Reference         | DAMA              | 3DCOMB    |
|-------|-------------------|-------------------|-----------|
| 1m14A | ELREAT            | ELREAT            | ELRE      |
| 1jk1A | FIKRRR            | FIKRRR            | FIK       |
| 1o61A | ILRkev            | ILRkev            | ILR       |
| 1tk1A | FVKVKG            | FVKVKG            | FVK       |
| 1phkA | IIDVTGGGSFSAEEVQE | IIDVTGGGSFSAEEVQE | IIDVTGGGS |
| 1lufA | MLKEEA            | MLKEEA            | MLKE      |
| 1j7uA | MTDS              | MTDS              | MTD       |
| 1jnkA | KLSPFPQ           | KLSPFPQ           | KLSP      |
| 1nw1A | VYFN              | VYFN              | VYF       |
| 1ir3A | TVNESA            | TVNESA            | TVN       |
| 1csnA | FEPRRS            | FEPRRS            | FEP       |
| 1hckA | KIR               | KIR               | KIR       |
| 2srcA | TLKP              | TLKP              | TLK       |
| 1howA | IVRG              | IVRG              | IVR       |
| 1o6yA | VLRADL            | VLRADL            | VLRA      |
| 1cdkA | ILDkqk            | ILDkqk            | ILD       |
| 1omwA | CLDkkr            | CLDkkr            | CLD       |
| 1a06A | CIAK              | CIAK              | CIA       |
| 1kwpA | MLQD              | MLQD              | MLQ       |
| 1muoA | VLFkaq            | VLFkaq            | VLF       |
| 1h1wA | ILEkrh            | ILEkrh            | ILE       |
| 1ia8A | IVDMKR            | IVDMKR            | IVD       |
| 1lp4A | ILKP              | ILKP              | ILK       |
| 1ia9A | SFLpev            | SFLpev            | SFL       |
| 1bo1A | TV                | TV                | TV        |
| 1cjaA | RS                | RS                | RS        |
| 1b6cA | IFSS              | IFSS              | IFS       |
| 1f3mA | QMNLQQ            | QMNLQQ            | QMN       |
| 1gnGA | KVL               | KVL               | KVL       |
| 1e8xA | HG                | HG                | FKH       |
| 1gjoA | MLKDDA            | MLKDDA            | MLK       |

Figure S2: Alignment of helices B or equivalent loops yielded by 3DCOMB and DAMA. Reference by Scheeff and Bourne (2005)

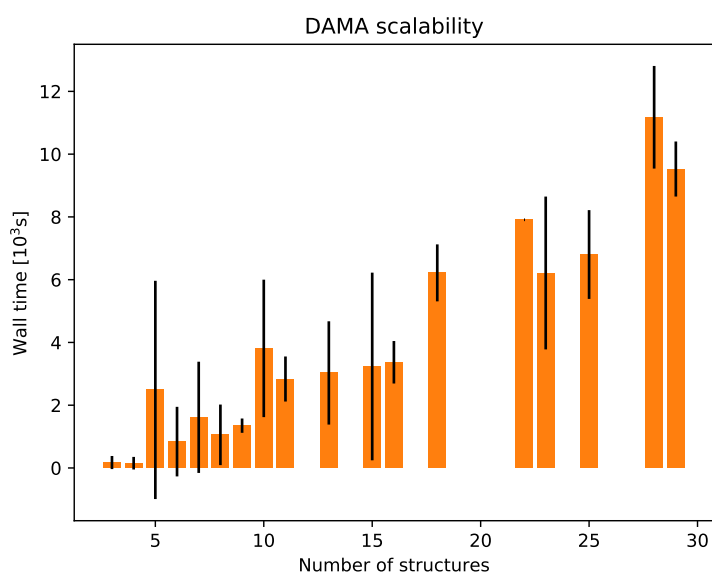

Figure S3: Scalability of DAMA measured on SISY-multiple. Bars show mean wall time for alignment of the same number of structures (with less than 30 structures) in SISY-multiple data set. Error bars show standard deviation. Calculation were performed on nodes equipped with 2x Intel Xeon E5-2640 2.50 GHz CPU and GeForce GTX 680 GPUs

Table S6: Alignment AL00047861 from SISY-Multiple resolved by DAMA. As reported in SISY-Multiple dataset description – curated manual alignment contains structural circular permutation and conformational variability.

| 1191A  | 1m12A  | 1n69B  | 1nklA  | 1of9A  | 1qdmA    |
|--------|--------|--------|--------|--------|----------|
| A:1:G  | A:2:D  | -      | A:1:G  | -      | A:66S:D  |
| A:2:R  | A:3:V  | B:2:D  | A:2:Y  | A:3:I  | A:67S:P  |
| A:3:D  | A:4:Y  | B:3:V  | A:3:F  | A:4:L  | A:68S:M  |
| A:4:Y  | A:5:C  | B:4:C  | A:4:C  | A:5:C  | A:69S:C  |
| A:5:R  | A:6:E  | B:5:Q  | A:5:E  | A:6:N  | A:70S:S  |
| A:6:T  | A:7:V  | B:6:D  | A:6:S  | A:7:L  | A:71S:A  |
| A:7:C  | A:8:C  | B:7:C  | A:7:C  | A:8:C  | A:72S:C  |
| A:8:L  | A:9:E  | B:8:I  | A:8:R  | A:9:T  | A:73S:E  |
| A:9:T  | A:10:F | B:9:Q  | A:9:K  | A:10:G | A:74S:M  |
| A:10:I | A:11:L | B:10:M | A:10:I | A:11:L | A:75S:A  |
| A:11:V | A:12:V | B:11:V | A:11:I | A:12:I | A:76S:V  |
| A:12:Q | A:13:K | B:12:T | A:12:Q | A:13:N | A:77S:V  |
| A:13:K | A:14:E | B:13:D | A:13:K | A:14:T | A:78S:W  |
| A:14:L | A:15:V | B:14:I | A:14:L | A:15:L | A:79S:M  |
| A:15:K | A:16:T | B:15:Q | A:15:E | A:16:E | A:80S:Q  |
| A:16:K | A:17:K | B:16:T | A:16:D | A:17:N | A:81S:N  |
| A:17:M | A:18:L | B:17:A | A:17:M | A:18:L | A:82S:Q  |
| A:18:V | A:19:I | B:18:V | A:18:V | A:19:L | A:83S:L  |
| A:19:D | A:20:D | B:19:R | A:19:G | A:20:T | A:84S:A  |
| A:20:K | A:21:N | B:20:T | A:20:P | -      | A:85S:Q  |
| -      | A:22:N | B:21:N | A:21:Q | A:21:T | A:86S:N  |
| A:21:P | A:23:K | -      | A:22:P | A:22:K | A:87S:K  |
| A:22:T | A:24:T | -      | A:23:N | A:23:G | A:88S:T  |
| A:23:Q | A:25:E | B:22:S | A:24:E | A:24:A | A:89S:Q  |
| A:24:R | A:26:K | B:23:T | A:25:D | A:25:D | A:90S:D  |
| A:25:S | A:27:E | B:24:F | A:26:T | A:26:K | A:91S:L  |
| A:26:V | A:28:I | B:25:V | A:27:V | A:27:V | A:92S:I  |
| A:27:S | A:29:L | B:26:Q | A:28:T | A:28:K | A:93S:L  |
| A:28:N | A:30:D | B:27:A | A:29:Q | A:29:D | A:94S:D  |
| A:29:A | A:31:A | B:28:L | A:30:A | A:30:Y | A:95S:Y  |
| A:30:A | A:32:F | B:29:V | A:31:A | A:31:I | A:96S:V  |
| A:31:T | A:33:D | B:30:E | A:32:S | A:32:S | A:97S:N  |
| A:32:R | A:34:K | B:31:H | A:33:Q | A:33:S | A:98S:Q  |
| A:33:V | A:35:M | B:32:V | A:34:V | A:34:L | A:99S:L  |
| A:34:C | A:36:C | B:33:K | A:35:C | A:35:C | A:100S:C |
| A:35:R | A:37:S | B:34:E | A:36:D | A:36:N | A:101S:N |
| A:36:T | A:38:K | B:35:E | A:37:K | A:37:K | A:102S:R |
| A:37:G | A:39:L | -      | A:38:L | A:38:A | A:103S:L |
| A:39:S | A:40:P | -      | A:39:K | A:40:G | A:104S:P |
| A:40:R | A:41:K | -      | A:40:I | A:41:F | A:248:S  |



Table S6 – continuation

|        |        |        |        |        |         |
|--------|--------|--------|--------|--------|---------|
| -      | A:42:S | -      | -      | -      | A:249:P |
| A:41:W | A:43:L | -      | A:41:L | A:42:I | -       |
| A:42:R | A:44:S | -      | A:42:R | A:43:A | A:3S:S  |
| A:43:D | A:45:E | -      | A:43:G | A:44:T | A:4S:Q  |
| A:44:V | A:46:E | -      | A:44:L | -      | A:5S:E  |
| A:45:C | A:47:C | -      | A:45:C | A:45:L | A:6S:C  |
| A:46:R | A:48:Q | -      | A:46:K | A:46:C | A:7S:K  |
| A:47:N | A:49:E | B:49:N | A:47:K | A:47:T | A:8S:T  |
| A:48:F | A:50:V | B:50:Y | A:48:I | A:48:K | A:9S:I  |
| A:49:M | A:51:V | B:51:I | A:49:M | A:49:V | A:10S:V |
| A:50:R | A:52:D | B:52:S | A:50:R | A:50:L | A:11S:S |
| A:51:R | A:53:T | B:53:Q | A:51:S | A:51:D | A:12S:Q |
| A:52:Y | A:54:Y | B:54:Y | A:52:F | A:52:F | A:13S:Y |
| A:53:Q | A:55:G | B:55:S | A:53:L | A:53:G | A:14S:G |
| A:54:S | A:56:S | B:56:E | A:54:R | A:55:D | A:15S:Q |
| A:55:R | A:57:S | B:57:I | A:55:R | A:56:K | A:16S:Q |
| A:56:V | A:58:I | B:58:A | A:56:I | A:57:L | A:17S:I |
| A:57:I | A:59:L | B:59:I | A:57:S | A:58:I | A:18S:L |
| A:58:Q | A:60:S | B:60:Q | A:58:W | A:59:Q | A:19S:D |
| A:59:G | A:61:I | B:61:M | A:59:D | A:60:L | A:20S:L |
| A:60:L | A:62:L | B:62:M | A:60:I | A:61:I | A:21S:L |
| A:61:V | A:63:L | B:63:M | A:61:L | A:62:E | A:22S:L |
| A:62:A | A:64:E | B:64:H | A:62:T | A:63:D | A:23S:A |
| A:63:G | A:65:E | -      | A:63:G | A:64:K | A:24S:E |
| A:64:E | A:66:V | B:65:M | A:64:K | A:65:V | A:25S:T |
| A:65:T | A:67:S | B:66:Q | A:65:K | A:66:D | A:26S:Q |
| A:66:A | A:68:P | B:67:P | A:66:P | A:67:A | A:27S:P |
| A:67:Q | A:69:E | B:68:K | A:67:Q | A:68:N | A:28S:K |
| A:68:Q | A:70:L | B:69:E | A:68:A | A:69:A | A:29S:K |
| A:69:I | A:71:V | B:70:I | A:69:I | A:70:I | A:30S:I |
| A:70:C | A:72:C | B:71:C | A:70:C | A:71:C | A:31S:C |
| A:71:E | A:73:S | B:72:A | A:71:V | A:72:A | A:32S:S |
| A:72:D | A:74:M | B:73:L | A:72:D | A:73:K | A:33S:Q |
| A:73:L | A:75:L | B:74:V | A:73:I | A:74:I | A:34S:V |
| A:74:R | A:76:H | B:75:G | A:74:K | A:75:H | A:35S:G |
| -      | A:77:L | B:76:F | A:75:I | A:76:A | A:36S:L |
| -      | A:78:C | B:77:C | A:76:C | -      | A:37S:C |
| -      | A:79:S | B:78:D | A:77:K | -      | -       |
| -      | A:80:G | -      | A:78:E | -      | -       |
